# Supplementary material for: The Evolution of Host Specialization in the Vertebrate Gut Symbiont Lactobacillus reuteri
Source: PLOS journal article supplement (doi:10.1371/journal.pgen.1001314), 2011-02-17
Supplement: S11 (10.1371/journal.pgen.1001314.s011) [file journal.pgen.1001314.s011]

Table S6. Genome characteristics of *Lactobacillus reuteri* strains

|  | 100-23 | mlc3 | F275 | MM4-1 | MM2-3 | lpuph1 | CF48-3a | ATCC 55730 | ATCC 53608 |
| --- | --- | --- | --- | --- | --- | --- | --- | --- | --- |
| Origin (Host) | rat | mouse | human | human | human | mouse | human | human | pig |
| MLSA Lineage | III | III | II | II | II | I | VI | VI | IV |
| Contigs | 2 | 126 | 1 | 131 | 167 | 127 | 244 | 339 | 142 |
| Genome Size, bp | 2 301 232 | 2 018 627 | 2 025 102 | 1 935 151 | 1 943 466 | 2 116 617 | 2 032 595 | 2 036 411 | 1969869 |
| G + C, % | 39 | 39 | 39 | 39 | 39 | 38 | 39 | 39 | 39 |
| Number of protein-coding genes, predicted | 2269 | 1859 | 1963 | 2045 | 2045 | 1902 | 2164 | 2235 | 1855 |
